# Supplementary material for: Endogenous IL-33 Deficiency Exacerbates Liver Injury and Increases Hepatic Influx of Neutrophils in Acute Murine Viral Hepatitis
Source: Hindawi journal article supplement (doi:10.1155/2017/1359064), 2017-01-01
Supplement: f1 [file 1359064.f1.pdf]

**Supplemental figure 1**

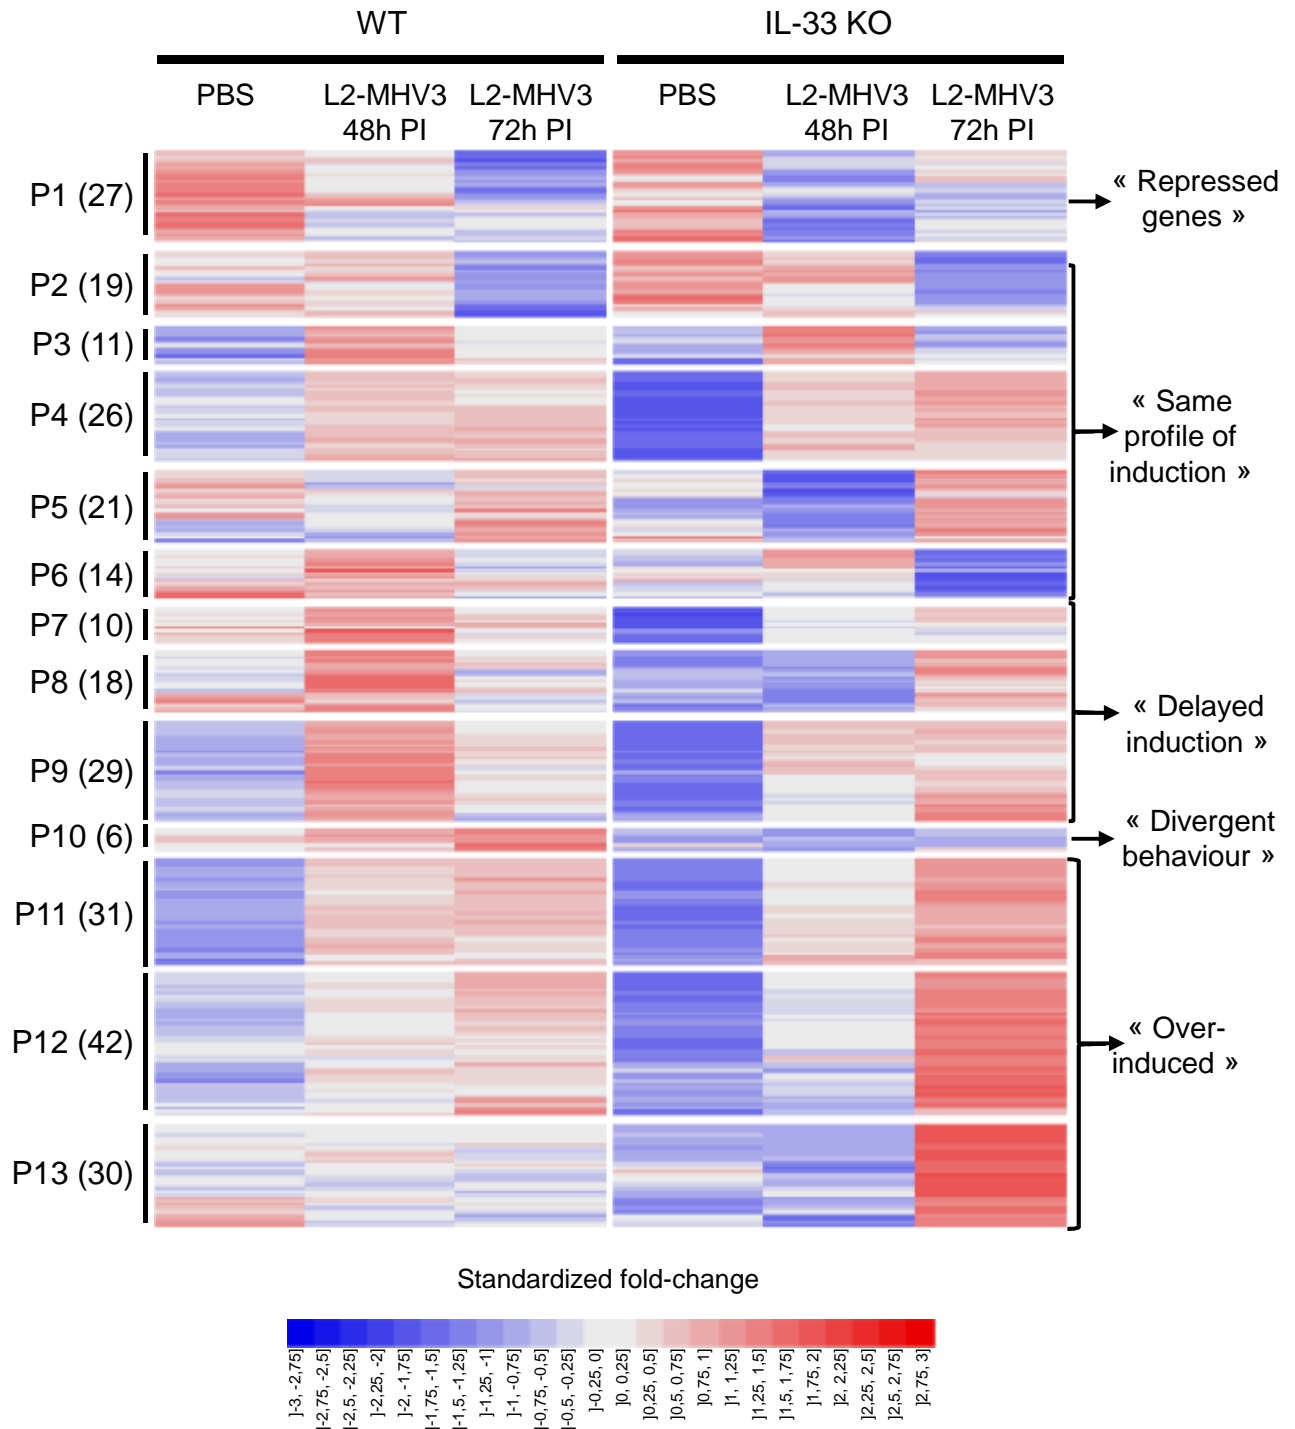

**Supplemental figure 1. False color heat map expression analysis of the up- and down-regulated genes in WT and IL-33 KO mice following L2-MHV3 induced hepatitis.** A pool of mRNA, constituted of at least 5 mice by condition, was tested by RT-qPCR for the expression of 344 genes involved in inflammation and cell signaling. The WT PBS condition served as the baseline value. Data processing and gene filtration was carried out using the AMEN suite of tools [25]. The resulting genes were classified into 13 expression patterns (termed P1-P13) using the k-means algorithm bioinformatics analysis and reported in a false-color heat map. Each column corresponds to a sample. Each line represents a gene and its log<sub>2</sub>-transformed fold-change value. A color scale is shown for log<sub>2</sub>-transformed fold-change values at the bottom: from blue (low fold-change) to red (high fold-change).

Supplemental table 1 : Sequences of specific primers used for RT-QPCR.

| Target genes | Forward primer                 | Reward primer                    |
|--------------|--------------------------------|----------------------------------|
| ARG1         | 5'-GCA GAG GTC CAG AAG AAT     | 5'-GTT GCC CAT GCA GAT TCC       |
| CCL2         | 5'-GTC CCT GTC ATG CTT CTG G   | 5'-TGC TGG TGA TCC TCT TGT AGC   |
| CCL6         | 5'-TCT TTA TCC TTG TGG CTG TCC | 5'-CTT TTA CAT GGG ATC TGT GTG G |
| CEACAM1      | 5'-CTGCCCTGGCGCTTGGGA          | 5'-TACATGAAATCGCACAGTCGC         |
| CXCL1        | 5'-CGC CTA TCG CCA ATG AGC     | 5'-GAA CCA AGG GAG CTT CAG       |
| CXCL2        | 5'-GAA CTG CGC TGT CAA TGC     | 5'-GGG CTT CAG GGT CAA GG        |
| CXCL3        | 5'                             |                                  |
| CXCL5        | 5'-CGC TAA TTT GGA GGT GAT CC  | 5'-AAC ACT GGC CGT TCT TTC C     |
| CXCL9        | 5'-CTC CTG CAT CAG CAC CAG     | 5'-TCT TCA CAT TTG CCG AGT CC    |
| CXCL10       | 5'-GCT GCC GTC ATT TTC TGC     | 5'-ACG TGG GCA GGA TAG GC        |
| CXCL11       | 5'-ACA GCT GCT CAA GGC TTC     | 5'-GTC CAG GCA CCT TTG TCG       |
| CXCR1        | 5'-GTC CCA CAT ATT TGG CTT CC  | 5'-TGT AGG GCA GAC AAC AGA GC    |
| CXCR2        | 5'-GAG GGT CGT ACT GCG TAT     | 5'-GGT CTC CTT GAT CAG CTT GG    |
| CXCR3        | 5'-GTT CTG CTG GTC TCC AGA GG  | 5'-CTC CCA CAA AGG CAT AGA GC    |
| IFN $\beta$  | 5'-CAG CTC CAG CTC CAA GAA AG  | 5'-ACC CAG TGC TGG AGA AAT TG    |
| IFN $\gamma$ | 5'-AAG ACA ATC AGG CCA TCA GC  | 5'-CAG CAG CGA CTC CTT TTC C     |
| IL-2         | 5'-GAA GAT GAA CTT GGA CCT CTG | 5'-AGG GCT TGT TGA GAT GAT GC    |
| IL-4         | 5'-GGC TTC CAA GGT GCT TCG     | 5'-GGA CTT GGA CTC ATT CAT GG    |
| IL-6         | 5'-CGA TGA TGC ACT TGC AGA     | 5'-CTC TGA AGG ACT CTG GCT TTG   |
| IL-33        | 5'-ATGGGAAAGAAGCTGATGGTG       | 5'-CCGAGGACTTTTTGTGAAG           |
| MHV3         | 5'-TGGAAGGTCTGCACCTGCTA        | 5'-TTTGGCCACGGGATTG              |
| TLR2         | 5'-AGG GAC GTT TGC TAT GAT GC  | 5'-GTT CGT ACT TGC ACC ACT CG    |
| TLR3         | 5'-CAC GAA CCT GAC AGA ACT CG  | 5'-CAC TTC GCA ACG CAA GG        |
| TNF $\alpha$ | 5'-CGA GTG ACA AGC CTG TAG CC  | 5'-AGA TAG CAA ATC GGC TGA CG    |

Supplemental table 2: Differential expression of 288 genes quantified in the six different conditions (WT PBS vs WT L2-MHV3 48h PI vs WT L2-MHV3 72hPI vs IL-33 KO PBS vs IL-33 KO L2-MHV3 48h PI vs IL-33 KO L2-MHV3 72h PI) and classified in 13 patterns using k-means algorithm bioinformatics analysis.

| Gene name | PATTERN | WT PBS | WT L2-MHV3-48h | WT L2-MHV3-72h | IL-33KO PBS | IL-33KO L2-MHV3-48h | IL-33KO L2-MHV3-72h |
|-----------|---------|--------|----------------|----------------|-------------|---------------------|---------------------|
| AHR       | 1       | 1,00   | 0,61           | 0,33           | 0,68        | 0,57                | 0,52                |
| BMP7      | 1       | 1,00   | 0,54           | 0,25           | 1,38        | 0,49                | 0,59                |
| GDF2      | 1       | 1,00   | 0,26           | 0,36           | 0,54        | 0,18                | 0,41                |
| BTLA      | 1       | 1,00   | 1,22           | 0,40           | 0,51        | 0,20                | 0,34                |
| CCL24     | 1       | 1,01   | 0,94           | 0,34           | 1,59        | 0,66                | 0,89                |
| CCL27     | 1       | 1,00   | 0,46           | 0,33           | 1,05        | 0,23                | 0,54                |
| CCR10     | 1       | 1,00   | 0,40           | 0,12           | 0,65        | 0,23                | 0,19                |
| CD163     | 1       | 0,90   | 0,48           | 0,22           | 0,90        | 0,22                | 0,56                |
| CD209     | 1       | 1,00   | 0,84           | 0,12           | 1,03        | 0,39                | 0,71                |
| CNTFR     | 1       | 1,00   | 0,53           | 0,31           | 0,69        | 0,26                | 0,78                |
| CX3CL1    | 1       | 1,01   | 0,55           | 0,35           | 0,52        | 0,28                | 0,67                |
| CXCL12    | 1       | 1,01   | 0,36           | 0,45           | 0,61        | 0,20                | 0,47                |
| CXCR3     | 1       | 1,00   | 0,72           | 0,42           | 0,61        | 0,54                | 0,42                |
| GFM1      | 1       | 1,00   | 0,54           | 0,60           | 1,34        | 0,46                | 0,61                |
| FGF1      | 1       | 1,00   | 0,47           | 0,59           | 0,81        | 0,37                | 0,43                |
| GPT       | 1       | 1,01   | 0,50           | 0,69           | 1,72        | 0,39                | 0,28                |
| HLX       | 1       | 1,00   | 0,67           | 0,36           | 0,76        | 0,37                | 0,60                |
| LIFR      | 1       | 1,01   | 0,29           | 0,31           | 0,72        | 0,24                | 0,32                |
| MRC1      | 1       | 1,00   | 0,54           | 0,55           | 0,78        | 0,29                | 0,60                |
| PIAS3     | 1       | 1,01   | 1,06           | 0,49           | 1,05        | 0,56                | 0,56                |
| PTH1R     | 1       | 1,00   | 0,42           | 0,27           | 1,22        | 0,39                | 0,39                |
| RORC      | 1       | 1,00   | 0,93           | 0,47           | 0,63        | 0,39                | 0,53                |
| SCARF2    | 1       | 1,00   | 0,83           | 0,70           | 1,42        | 0,50                | 1,02                |
| TNFRSF19  | 1       | 1,00   | 0,18           | 0,06           | 0,63        | 0,08                | 0,11                |
| NTRK2     | 1       | 1,00   | 0,20           | 0,11           | 2,37        | 0,04                | 0,19                |
| VEGFA     | 1       | 1,00   | 0,75           | 0,87           | 1,11        | 0,48                | 0,68                |
| VEGFB     | 1       | 1,00   | 0,76           | 0,34           | 1,23        | 0,50                | 0,82                |
| APOE      | 2       | 1,01   | 0,73           | 0,51           | 1,05        | 0,68                | 0,49                |
| TNFSF13   | 2       | 1,00   | 1,76           | 0,44           | 2,56        | 2,40                | 0,42                |
| CD276     | 2       | 1,00   | 0,57           | 0,25           | 0,98        | 0,77                | 0,50                |
| CD4       | 2       | 1,00   | 0,82           | 0,22           | 1,81        | 0,56                | 0,26                |
| CSF1R     | 2       | 1,00   | 0,61           | 0,25           | 0,99        | 0,49                | 0,17                |
| KIT       | 2       | 1,00   | 0,92           | 0,24           | 1,17        | 1,24                | 0,29                |
| EGFR      | 2       | 1,00   | 1,17           | 0,56           | 1,53        | 1,31                | 0,40                |
| FOXP3     | 2       | 1,00   | 6,00           | 0,60           | 3,51        | 5,65                | 0,55                |
| IFNAR1    | 2       | 1,00   | 0,80           | 0,68           | 1,41        | 1,34                | 0,66                |
| CHUK      | 2       | 1,01   | 1,25           | 0,66           | 2,00        | 1,14                | 0,44                |
| IL18      | 2       | 1,00   | 0,82           | 0,53           | 1,15        | 0,60                | 0,48                |
| IL21R     | 2       | 1,01   | 1,54           | 0,02           | 0,57        | 1,42                | 0,76                |
| IL9       | 2       | 1,00   | 4,05           | 0,01           | 0,45        | 2,18                | 3,01                |

| Gene name | PATTERN | WT<br>PBS | WT<br>L2-MHV3-<br>48h | WT<br>L2-MHV3-<br>72h | IL-33KO<br>PBS | IL-33KO<br>L2-MHV3-<br>48h | IL-33KO<br>L2-MHV3-<br>72h |
|-----------|---------|-----------|-----------------------|-----------------------|----------------|----------------------------|----------------------------|
| LIFR      | 2       | 1,00      | 0,92                  | 0,37                  | 2,99           | 0,76                       | 0,31                       |
| SERPINF1  | 2       | 1,00      | 0,43                  | 0,17                  | 0,84           | 0,33                       | 0,15                       |
| STAT5A    | 2       | 1,00      | 1,67                  | 0,56                  | 2,08           | 1,44                       | 0,56                       |
| STAT5B    | 2       | 1,00      | 1,20                  | 0,19                  | 2,20           | 0,98                       | 0,14                       |
| TIRAP     | 2       | 1,00      | 1,61                  | 0,65                  | 2,37           | 2,68                       | 0,41                       |
| NTRK1     | 2       | 1,01      | 0,40                  | 0,04                  | 0,29           | 0,26                       | 0,14                       |
| FLT3LG    | 3       | 1,00      | 2,37                  | 1,71                  | 1,44           | 1,87                       | 1,67                       |
| IKBKG     | 3       | 1,00      | 2,32                  | 1,25                  | 1,42           | 2,21                       | 0,97                       |
| IL1B      | 3       | 1,00      | 2,71                  | 1,99                  | 0,64           | 2,54                       | 1,41                       |
| MYD88     | 3       | 1,00      | 2,79                  | 1,92                  | 1,09           | 5,08                       | 1,36                       |
| NFKB1     | 3       | 1,00      | 1,23                  | 0,94                  | 0,70           | 1,60                       | 0,65                       |
| OSM       | 3       | 1,01      | 10,38                 | 5,56                  | 0,20           | 8,09                       | 1,01                       |
| IL27      | 3       | 1,01      | 8,85                  | 3,28                  | 1,17           | 6,31                       | 2,10                       |
| CD180     | 3       | 1,01      | 3,13                  | 1,89                  | 1,24           | 4,52                       | 0,89                       |
| TBK1      | 3       | 1,01      | 4,88                  | 2,08                  | 1,84           | 4,77                       | 1,47                       |
| TNFRSF1A  | 3       | 1,00      | 2,97                  | 1,50                  | 1,19           | 3,22                       | 1,03                       |
| EDA2R     | 3       | 1,01      | 9,71                  | 2,43                  | 1,16           | 9,31                       | 2,23                       |
| ALPL      | 4       | 1,00      | 2,67                  | 2,13                  | 0,41           | 2,50                       | 3,87                       |
| TNFSF13B  | 4       | 1,00      | 1,42                  | 0,96                  | 0,29           | 1,65                       | 2,80                       |
| CCL12     | 4       | 1,01      | 61,41                 | 50,42                 | 0,18           | 38,89                      | 65,72                      |
| CCL7      | 4       | 1,00      | 48,95                 | 42,10                 | 0,07           | 34,86                      | 97,04                      |
| CCR1      | 4       | 1,00      | 5,91                  | 5,50                  | 0,22           | 5,54                       | 10,61                      |
| LY75      | 4       | 1,00      | 1,34                  | 1,06                  | 0,37           | 1,31                       | 1,57                       |
| CXCR1     | 4       | 1,00      | 3,24                  | 3,00                  | 0,22           | 2,07                       | 2,04                       |
| GCNT1     | 4       | 1,00      | 1,56                  | 1,70                  | 0,78           | 1,83                       | 1,47                       |
| IFNG      | 4       | 1,00      | 3,66                  | 4,22                  | 0,57           | 1,46                       | 1,94                       |
| IL10      | 4       | 1,00      | 11,85                 | 12,14                 | 0,33           | 5,65                       | 10,26                      |
| IL18RAP   | 4       | 1,00      | 1,93                  | 3,00                  | 0,31           | 2,22                       | 3,36                       |
| IL36G     | 4       | 1,00      | 7,98                  | 5,82                  | 0,30           | 6,14                       | 7,88                       |
| IL1R1     | 4       | 1,00      | 3,29                  | 3,98                  | 0,25           | 1,52                       | 5,69                       |
| IFNLR1    | 4       | 1,00      | 2,26                  | 2,17                  | 0,27           | 1,79                       | 2,86                       |
| IL2RB     | 4       | 1,00      | 1,33                  | 1,61                  | 0,46           | 1,02                       | 1,41                       |
| IL2RG     | 4       | 1,00      | 1,62                  | 1,49                  | 0,49           | 1,73                       | 1,41                       |
| CSF2RB    | 4       | 1,00      | 2,11                  | 1,58                  | 0,53           | 1,65                       | 2,55                       |
| LBP       | 4       | 1,00      | 2,83                  | 2,45                  | 0,23           | 2,21                       | 2,27                       |
| CCL3      | 4       | 1,00      | 11,79                 | 23,72                 | 0,16           | 8,74                       | 8,73                       |
| S100A8    | 4       | 1,00      | 9,18                  | 12,53                 | 0,08           | 8,07                       | 13,53                      |
| S100a8    | 4       | 1,00      | 7,83                  | 8,29                  | 0,13           | 9,91                       | 14,47                      |
| S100A9    | 4       | 1,01      | 5,46                  | 4,97                  | 0,11           | 7,08                       | 10,05                      |
| S100A9    | 4       | 1,00      | 6,40                  | 4,54                  | 0,09           | 6,14                       | 9,84                       |
| SAA1      | 4       | 1,00      | 5,72                  | 10,97                 | 0,01           | 6,26                       | 12,69                      |
| SAA3P     | 4       | 1,00      | 10,87                 | 21,31                 | 0,01           | 12,57                      | 28,37                      |
| SOCS3     | 4       | 1,00      | 3,13                  | 5,59                  | 0,22           | 3,50                       | 8,43                       |

| Gene name | PATTERN | WT<br>PBS | WT<br>L2-MHV3-<br>48h | WT<br>L2-MHV3-<br>72h | IL-33KO<br>PBS | IL-33KO<br>L2-MHV3-<br>48h | IL-33KO<br>L2-MHV3-<br>72h |
|-----------|---------|-----------|-----------------------|-----------------------|----------------|----------------------------|----------------------------|
| BMP5      | 5       | 1,00      | 0,34                  | 0,45                  | 0,59           | 0,23                       | 1,01                       |
| CD36      | 5       | 1,00      | 0,66                  | 1,14                  | 0,78           | 0,34                       | 1,33                       |
| S1PR1     | 5       | 1,01      | 1,20                  | 2,17                  | 1,80           | 1,26                       | 1,99                       |
| FGFR2     | 5       | 1,00      | 1,23                  | 1,81                  | 1,47           | 0,65                       | 1,64                       |
| GOT1      | 5       | 1,00      | 1,69                  | 3,37                  | 1,54           | 0,76                       | 2,86                       |
| GOT1      | 5       | 1,00      | 1,54                  | 3,50                  | 1,30           | 0,58                       | 3,26                       |
| GPT2      | 5       | 1,00      | 0,84                  | 1,02                  | 0,71           | 0,37                       | 0,84                       |
| IL17RB    | 5       | 1,00      | 0,65                  | 1,00                  | 0,51           | 0,54                       | 1,19                       |
| IL27RA    | 5       | 1,00      | 0,67                  | 0,84                  | 0,55           | 0,48                       | 0,97                       |
| IL6R      | 5       | 1,00      | 0,90                  | 1,22                  | 0,50           | 0,46                       | 1,47                       |
| IL6R      | 5       | 1,00      | 0,88                  | 1,09                  | 0,55           | 0,48                       | 1,28                       |
| LRP5      | 5       | 1,00      | 1,22                  | 2,59                  | 1,27           | 0,91                       | 3,41                       |
| LRP6      | 5       | 1,01      | 0,55                  | 0,85                  | 0,73           | 0,27                       | 0,51                       |
| LRP6      | 5       | 1,00      | 0,71                  | 2,62                  | 1,15           | 0,55                       | 2,61                       |
| PIAS2     | 5       | 1,00      | 0,65                  | 1,12                  | 0,69           | 0,33                       | 1,83                       |
| SMAD7     | 5       | 1,01      | 0,71                  | 1,54                  | 1,75           | 0,79                       | 1,18                       |
| SOCS4     | 5       | 1,00      | 1,11                  | 1,04                  | 1,03           | 0,53                       | 1,16                       |
| TLR5      | 5       | 1,00      | 0,50                  | 0,94                  | 0,80           | 0,47                       | 1,06                       |
| TOLLIP    | 5       | 1,00      | 0,60                  | 0,64                  | 0,54           | 0,40                       | 0,92                       |
| VEGFA     | 5       | 1,00      | 0,74                  | 0,92                  | 0,90           | 0,47                       | 1,08                       |
| WNT5B     | 5       | 1,00      | 0,73                  | 1,73                  | 0,57           | 0,51                       | 1,45                       |
| CXCL13    | 6       | 1,00      | 0,48                  | 0,08                  | 0,11           | 0,18                       | 0,13                       |
| EBI3      | 6       | 1,00      | 1,28                  | 0,64                  | 1,02           | 1,30                       | 0,46                       |
| FGF10     | 6       | 1,24      | 5,11                  | 1,19                  | 1,23           | 1,24                       | 0,77                       |
| FGF3      | 6       | 1,00      | 0,75                  | 0,67                  | 0,30           | 0,51                       | 0,10                       |
| IKZF2     | 6       | 1,00      | 1,31                  | 0,67                  | 0,60           | 1,49                       | 0,37                       |
| IKZF2     | 6       | 1,00      | 1,55                  | 0,81                  | 0,68           | 1,37                       | 0,57                       |
| IL6R      | 6       | 1,00      | 0,66                  | 0,51                  | 0,45           | 0,36                       | 0,28                       |
| CXCR2     | 6       | 1,02      | 4,65                  | 2,32                  | 2,05           | 2,06                       | 0,15                       |
| RPS18     | 6       | 1,00      | 1,02                  | 0,87                  | 0,96           | 0,96                       | 0,26                       |
| TBATA     | 6       | 1,00      | 1,53                  | 0,88                  | 0,85           | 1,69                       | 0,49                       |
| TEK       | 6       | 1,01      | 0,53                  | 0,64                  | 1,18           | 0,41                       | 0,10                       |
| TLR6      | 6       | 1,09      | 2,98                  | 1,14                  | 0,49           | 2,18                       | 0,21                       |
| TSLP      | 6       | 1,00      | 1,32                  | 1,29                  | 0,55           | 0,76                       | 0,31                       |
| XCR1      | 6       | 1,01      | 1,00                  | 0,44                  | 0,47           | 0,55                       | 0,22                       |
| ANG       | 7       | 1,00      | 1,28                  | 0,66                  | 0,43           | 0,75                       | 0,60                       |
| ICOSLG    | 7       | 1,00      | 1,50                  | 0,82                  | 0,41           | 0,78                       | 0,90                       |
| CCR8      | 7       | 1,00      | 2,76                  | 0,68                  | 0,03           | 0,25                       | 1,22                       |
| CD86      | 7       | 1,00      | 1,58                  | 1,01                  | 0,47           | 0,85                       | 0,84                       |
| CD86      | 7       | 1,00      | 1,73                  | 1,34                  | 0,49           | 0,98                       | 1,39                       |
| CRP       | 7       | 1,00      | 1,18                  | 1,04                  | 0,47           | 0,98                       | 1,04                       |
| CXCL9     | 7       | 1,00      | 3,31                  | 1,00                  | 0,09           | 0,94                       | 1,75                       |
| IL23R     | 7       | 1,06      | 5,97                  | 0,98                  | 0,37           | 1,12                       | 0,87                       |

| Gene name | PATTERN | WT<br>PBS | WT<br>L2-MHV3-<br>48h | WT<br>L2-MHV3-<br>72h | IL-33KO<br>PBS | IL-33KO<br>L2-MHV3-<br>48h | IL-33KO<br>L2-MHV3-<br>72h |
|-----------|---------|-----------|-----------------------|-----------------------|----------------|----------------------------|----------------------------|
| MARCO     | 7       | 1,00      | 0,49                  | 0,79                  | 0,14           | 0,37                       | 0,56                       |
| TLR1      | 7       | 1,00      | 1,49                  | 1,40                  | 0,32           | 0,95                       | 0,93                       |
| CCR7      | 8       | 1,00      | 3,36                  | 1,09                  | 0,57           | 0,45                       | 1,24                       |
| CD8B      | 8       | 1,00      | 1,54                  | 0,71                  | 0,39           | 0,50                       | 0,89                       |
| ERBB2     | 8       | 1,00      | 0,72                  | 0,49                  | 0,50           | 0,38                       | 0,80                       |
| IL31RA    | 8       | 1,00      | 1,90                  | 1,34                  | 0,72           | 0,60                       | 2,31                       |
| IL15RA    | 8       | 1,00      | 0,83                  | 0,63                  | 0,45           | 0,43                       | 0,84                       |
| IL7R      | 8       | 1,01      | 2,49                  | 1,49                  | 0,56           | 0,79                       | 2,32                       |
| CCL22     | 8       | 1,00      | 2,38                  | 1,13                  | 0,56           | 0,63                       | 2,03                       |
| MMP2      | 8       | 1,01      | 2,11                  | 1,56                  | 1,13           | 0,76                       | 1,51                       |
| SP7       | 8       | 1,06      | 0,91                  | 0,31                  | 0,18           | 0,09                       | 1,30                       |
| TNFRSF4   | 8       | 1,00      | 2,58                  | 0,96                  | 0,99           | 1,10                       | 2,24                       |
| RELT      | 8       | 1,00      | 1,27                  | 0,78                  | 0,48           | 0,69                       | 1,14                       |
| STAT4     | 8       | 1,00      | 3,42                  | 1,50                  | 0,70           | 0,70                       | 1,62                       |
| STAT4     | 8       | 1,00      | 4,12                  | 1,46                  | 0,60           | 0,46                       | 0,95                       |
| TGFB3     | 8       | 1,00      | 1,95                  | 0,51                  | 0,62           | 0,57                       | 2,55                       |
| THY1      | 8       | 1,00      | 1,08                  | 0,60                  | 0,47           | 0,49                       | 0,69                       |
| TLR7      | 8       | 1,00      | 2,14                  | 1,76                  | 0,33           | 0,49                       | 2,22                       |
| LTB       | 8       | 1,00      | 1,87                  | 1,14                  | 0,57           | 0,73                       | 1,28                       |
| FIGF      | 8       | 1,00      | 4,22                  | 1,51                  | 0,86           | 0,62                       | 2,08                       |
| ACVRL1    | 9       | 1,00      | 2,23                  | 1,73                  | 0,74           | 2,09                       | 1,55                       |
| CD274     | 9       | 1,00      | 19,47                 | 7,49                  | 0,32           | 8,99                       | 9,68                       |
| CCR2      | 9       | 1,01      | 2,02                  | 1,61                  | 0,79           | 1,43                       | 1,44                       |
| CCR5      | 9       | 1,00      | 2,64                  | 1,43                  | 0,80           | 1,33                       | 1,61                       |
| FCGR3     | 9       | 1,00      | 2,81                  | 1,53                  | 1,18           | 2,03                       | 2,09                       |
| CD40      | 9       | 1,00      | 4,20                  | 2,26                  | 0,55           | 2,74                       | 2,37                       |
| CD68      | 9       | 1,00      | 1,80                  | 1,15                  | 0,64           | 1,27                       | 2,02                       |
| CD80      | 9       | 1,00      | 3,54                  | 1,78                  | 0,57           | 1,82                       | 2,23                       |
| CXCR4     | 9       | 1,01      | 4,51                  | 1,59                  | 0,56           | 1,87                       | 4,47                       |
| NOS3      | 9       | 1,00      | 2,33                  | 1,42                  | 0,59           | 1,56                       | 3,36                       |
| FAS       | 9       | 1,00      | 2,32                  | 1,37                  | 0,64           | 1,38                       | 1,48                       |
| FASLG     | 9       | 1,02      | 2,23                  | 1,67                  | 0,72           | 1,09                       | 2,03                       |
| FPR2      | 9       | 1,00      | 3,25                  | 1,85                  | 0,54           | 2,08                       | 2,73                       |
| TNFRSF18  | 9       | 1,00      | 2,69                  | 1,75                  | 0,44           | 1,09                       | 2,80                       |
| IL10RA    | 9       | 1,00      | 1,85                  | 0,97                  | 0,65           | 1,44                       | 1,35                       |
| IL13      | 9       | 1,00      | 2,96                  | 0,89                  | 0,81           | 1,66                       | 4,62                       |
| IL19      | 9       | 1,01      | 73,58                 | 7,88                  | 0,13           | 24,73                      | 21,29                      |
| IL1A      | 9       | 1,00      | 2,04                  | 1,33                  | 0,56           | 1,23                       | 1,66                       |
| IL21      | 9       | 1,01      | 2,31                  | 1,13                  | 0,96           | 1,28                       | 2,48                       |
| KITLG     | 9       | 1,01      | 2,47                  | 1,67                  | 0,77           | 1,40                       | 1,76                       |
| IFIH1     | 9       | 1,00      | 6,53                  | 3,65                  | 0,81           | 4,30                       | 5,18                       |
| IL-27     | 9       | 1,00      | 7,36                  | 4,80                  | 0,53           | 3,42                       | 4,70                       |
| STAT1     | 9       | 1,01      | 7,25                  | 4,75                  | 0,55           | 4,22                       | 6,05                       |

| Gene name | PATTERN | WT<br>PBS | WT<br>L2-MHV3-<br>48h | WT<br>L2-MHV3-<br>72h | IL-33KO<br>PBS | IL-33KO<br>L2-MHV3-<br>48h | IL-33KO<br>L2-MHV3-<br>72h |
|-----------|---------|-----------|-----------------------|-----------------------|----------------|----------------------------|----------------------------|
| TLR4      | 9       | 1,00      | 2,17                  | 1,59                  | 0,90           | 1,34                       | 1,76                       |
| TNFSF10   | 9       | 1,00      | 8,55                  | 2,39                  | 0,63           | 4,65                       | 2,63                       |
| TNFSF10   | 9       | 1,00      | 7,47                  | 2,29                  | 0,35           | 2,64                       | 1,47                       |
| TNFRSF10A | 9       | 1,05      | 4,89                  | 2,03                  | 0,44           | 3,62                       | 3,74                       |
| XCL1      | 9       | 1,01      | 2,49                  | 1,97                  | 0,52           | 1,24                       | 2,23                       |
| EDA2R     | 9       | 1,01      | 7,69                  | 3,30                  | 0,27           | 4,45                       | 4,70                       |
| ARG1      | 10      | 1,00      | 1,40                  | 2,16                  | 0,72           | 0,64                       | 1,32                       |
| HPRT1     | 10      | 0,92      | 0,94                  | 2,02                  | 1,11           | 0,64                       | 0,64                       |
| IL12A     | 10      | 1,01      | 1,34                  | 1,42                  | 0,64           | 0,60                       | 0,73                       |
| IL18R1    | 10      | 1,01      | 1,48                  | 1,75                  | 0,76           | 0,66                       | 0,77                       |
| IL33      | 10      | 1,03      | 2,49                  | 3,52                  | 0,00           | 0,01                       | 0,01                       |
| IL33      | 10      | 1,01      | 2,58                  | 3,29                  | 0,00           | 0,01                       | 0,01                       |
| ANGPT2    | 11      | 1,00      | 4,19                  | 3,04                  | 0,58           | 2,52                       | 10,35                      |
| ITGB3     | 11      | 1,00      | 3,45                  | 3,80                  | 0,80           | 2,63                       | 5,06                       |
| CCL2      | 11      | 1,00      | 18,90                 | 50,63                 | 0,28           | 14,15                      | 207,67                     |
| CCRL2     | 11      | 1,00      | 11,05                 | 6,97                  | 0,57           | 8,23                       | 27,60                      |
| CD14      | 11      | 1,00      | 23,44                 | 31,79                 | 0,29           | 13,18                      | 89,70                      |
| CXCL1     | 11      | 1,00      | 13,46                 | 18,30                 | 0,19           | 13,47                      | 72,81                      |
| CXCL10    | 11      | 1,00      | 29,06                 | 33,15                 | 0,28           | 13,56                      | 51,65                      |
| CXCL11    | 11      | 1,00      | 11,40                 | 20,85                 | 0,73           | 5,02                       | 53,80                      |
| CXCL14    | 11      | 1,00      | 2,58                  | 2,01                  | 0,70           | 6,45                       | 14,21                      |
| CXCL2     | 11      | 1,00      | 37,29                 | 88,33                 | 0,36           | 23,59                      | 593,79                     |
| GATA2     | 11      | 1,01      | 2,56                  | 2,47                  | 0,71           | 1,66                       | 3,09                       |
| IFNB1     | 11      | 1,32      | 695,50                | 1465,43               | 0,71           | 604,51                     | 3741,26                    |
| IL17RA    | 11      | 1,00      | 3,07                  | 3,25                  | 0,79           | 3,52                       | 5,59                       |
| IL18BP    | 11      | 1,00      | 6,99                  | 7,59                  | 0,51           | 5,88                       | 7,57                       |
| IL18RAP   | 11      | 1,00      | 3,05                  | 4,14                  | 0,40           | 2,17                       | 6,29                       |
| IL1R2     | 11      | 1,00      | 16,14                 | 27,06                 | 0,15           | 12,61                      | 72,95                      |
| IL22RA1   | 11      | 1,01      | 3,85                  | 4,51                  | 0,75           | 2,37                       | 6,28                       |
| IL4R      | 11      | 1,00      | 3,12                  | 4,99                  | 1,04           | 2,55                       | 8,02                       |
| IL6       | 11      | 1,01      | 27,66                 | 19,57                 | 1,68           | 19,98                      | 64,01                      |
| LIF       | 11      | 1,00      | 29,12                 | 51,79                 | 0,28           | 14,96                      | 145,00                     |
| CCL4      | 11      | 1,00      | 21,65                 | 28,36                 | 0,28           | 17,01                      | 45,27                      |
| CCL4      | 11      | 1,00      | 19,21                 | 26,97                 | 0,25           | 13,83                      | 43,60                      |
| OSMR      | 11      | 1,00      | 6,90                  | 9,60                  | 0,65           | 5,97                       | 13,25                      |
| SOCS1     | 11      | 1,00      | 138,64                | 98,10                 | 1,31           | 180,81                     | 156,12                     |
| TLR2      | 11      | 1,00      | 15,78                 | 16,39                 | 0,30           | 7,61                       | 24,41                      |
| TLR3      | 11      | 1,01      | 11,63                 | 6,42                  | 0,77           | 7,34                       | 15,24                      |
| TLR9      | 11      | 1,00      | 9,84                  | 11,40                 | 0,54           | 6,21                       | 11,96                      |
| TNF       | 11      | 1,00      | 8,66                  | 16,31                 | 0,41           | 7,41                       | 20,33                      |
| CRLF2     | 11      | 1,00      | 2,32                  | 3,38                  | 0,85           | 1,89                       | 2,99                       |
| CRLF2     | 11      | 1,00      | 2,26                  | 3,00                  | 1,35           | 3,36                       | 3,06                       |
| THBS1     | 11      | 1,00      | 16,00                 | 8,70                  | 0,64           | 8,60                       | 49,70                      |

| Gene name | PATTERN | WT<br>PBS | WT<br>L2-MHV3-<br>48h | WT<br>L2-MHV3-<br>72h | IL-33KO<br>PBS | IL-33KO<br>L2-MHV3-<br>48h | IL-33KO<br>L2-MHV3-<br>72h |
|-----------|---------|-----------|-----------------------|-----------------------|----------------|----------------------------|----------------------------|
| TNFSF9    | 12      | 1,01      | 2,17                  | 2,77                  | 0,78           | 1,78                       | 8,62                       |
| TNFSF9    | 12      | 1,01      | 6,10                  | 16,72                 | 0,13           | 2,63                       | 34,26                      |
| ITGA5     | 12      | 1,00      | 1,36                  | 1,61                  | 0,76           | 1,30                       | 2,27                       |
| ACTB      | 12      | 1,01      | 1,05                  | 1,11                  | 0,65           | 0,94                       | 1,40                       |
| B2M       | 12      | 1,00      | 1,82                  | 2,00                  | 1,04           | 1,17                       | 3,99                       |
| CCL6      | 12      | 1,00      | 2,23                  | 3,06                  | 0,46           | 1,62                       | 7,55                       |
| ITGAM     | 12      | 1,01      | 2,08                  | 6,38                  | 0,19           | 1,67                       | 8,32                       |
| ITGAX     | 12      | 1,00      | 1,80                  | 4,58                  | 0,39           | 1,38                       | 9,55                       |
| SELP      | 12      | 1,00      | 2,52                  | 6,14                  | 0,51           | 1,89                       | 27,42                      |
| CLC       | 12      | 1,00      | 2,27                  | 3,64                  | 0,49           | 1,22                       | 148,59                     |
| CLEC1A    | 12      | 1,00      | 1,51                  | 1,89                  | 0,62           | 0,89                       | 1,52                       |
| CXCL16    | 12      | 1,00      | 1,19                  | 0,98                  | 0,59           | 0,80                       | 1,80                       |
| CXCL5     | 12      | 1,01      | 3,25                  | 3,19                  | 0,13           | 1,88                       | 25,92                      |
| PPBP      | 12      | 1,01      | 1,03                  | 0,82                  | 0,26           | 1,15                       | 2,80                       |
| FGA       | 12      | 1,00      | 1,08                  | 1,77                  | 0,42           | 1,16                       | 2,79                       |
| FGB       | 12      | 1,00      | 1,37                  | 2,24                  | 0,39           | 1,18                       | 3,26                       |
| FGF2      | 12      | 1,00      | 2,74                  | 2,27                  | 1,32           | 0,89                       | 5,15                       |
| FGG       | 12      | 1,00      | 1,01                  | 1,50                  | 0,53           | 1,73                       | 3,15                       |
| GATA3     | 12      | 1,01      | 1,03                  | 1,80                  | 0,54           | 0,82                       | 1,32                       |
| GZMB      | 12      | 1,00      | 11,42                 | 22,71                 | 0,36           | 5,15                       | 171,54                     |
| GSR       | 12      | 1,00      | 1,27                  | 3,37                  | 0,89           | 1,11                       | 4,66                       |
| ICAM1     | 12      | 1,00      | 2,68                  | 6,73                  | 0,23           | 1,48                       | 8,16                       |
| IFNAR2    | 12      | 1,00      | 1,50                  | 1,61                  | 0,76           | 1,13                       | 2,06                       |
| IKBKB     | 12      | 1,00      | 1,15                  | 1,66                  | 0,90           | 0,84                       | 2,23                       |
| IL10RB    | 12      | 1,00      | 0,97                  | 1,24                  | 0,74           | 0,79                       | 1,60                       |
| IL12RB2   | 12      | 1,01      | 3,29                  | 2,65                  | 0,62           | 1,33                       | 27,65                      |
| IL13RA1   | 12      | 1,00      | 1,75                  | 1,47                  | 0,53           | 1,19                       | 3,42                       |
| CSF1      | 12      | 1,00      | 1,72                  | 2,88                  | 0,31           | 1,11                       | 6,76                       |
| MMP14     | 12      | 1,00      | 1,22                  | 1,46                  | 0,59           | 0,89                       | 3,14                       |
| TNFRSF11B | 12      | 1,00      | 1,77                  | 1,77                  | 0,59           | 1,08                       | 3,36                       |
| PDGFRB    | 12      | 1,00      | 2,07                  | 1,88                  | 0,99           | 1,58                       | 3,47                       |
| PDGFRB    | 12      | 1,01      | 1,83                  | 1,67                  | 0,83           | 1,14                       | 3,65                       |
| SELE      | 12      | 1,00      | 3,29                  | 4,44                  | 0,35           | 2,62                       | 18,86                      |
| STAT3     | 12      | 1,00      | 1,80                  | 2,19                  | 0,52           | 1,03                       | 3,03                       |
| TGFBR2    | 12      | 1,01      | 1,26                  | 1,14                  | 0,67           | 0,91                       | 1,94                       |
| TLR7      | 12      | 1,00      | 2,01                  | 1,89                  | 0,99           | 1,29                       | 2,81                       |
| TLR8      | 12      | 1,00      | 2,08                  | 4,98                  | 0,92           | 1,01                       | 4,62                       |
| TNFRSF1B  | 12      | 1,00      | 1,38                  | 1,13                  | 0,58           | 1,02                       | 1,88                       |
| TNFRSF1A  | 12      | 1,00      | 2,18                  | 2,89                  | 0,71           | 1,32                       | 3,19                       |
| TRAF6     | 12      | 1,00      | 1,85                  | 2,59                  | 1,01           | 1,11                       | 3,85                       |
| TNFRSF12A | 12      | 1,01      | 3,96                  | 6,62                  | 0,57           | 1,73                       | 22,52                      |
| VEGFC     | 12      | 1,00      | 2,34                  | 2,57                  | 1,44           | 1,76                       | 4,69                       |
| BMP10     | 13      | 1,01      | 0,42                  | 0,46                  | 0,43           | 0,23                       | 1,13                       |



| Gene name | PATTERN | WT<br>PBS | WT<br>L2-MHV3-<br>48h | WT<br>L2-MHV3-<br>72h | IL-33KO<br>PBS | IL-33KO<br>L2-MHV3-<br>48h | IL-33KO<br>L2-MHV3-<br>72h |
|-----------|---------|-----------|-----------------------|-----------------------|----------------|----------------------------|----------------------------|
| CTSK      | 13      | 1,00      | 1,06                  | 0,78                  | 0,71           | 0,70                       | 1,81                       |
| CCL5      | 13      | 1,00      | 0,27                  | 0,51                  | 0,07           | 0,12                       | 1,36                       |
| CCL9      | 13      | 1,01      | 0,59                  | 0,64                  | 0,62           | 0,50                       | 1,14                       |
| CISH      | 13      | 1,00      | 0,78                  | 0,65                  | 0,76           | 0,50                       | 1,12                       |
| COL1A1    | 13      | 1,00      | 1,18                  | 0,83                  | 0,61           | 0,71                       | 2,58                       |
| SLC6A8    | 13      | 1,00      | 0,74                  | 0,54                  | 1,06           | 0,68                       | 10,81                      |
| PF4       | 13      | 1,00      | 0,83                  | 0,79                  | 0,54           | 0,51                       | 2,65                       |
| EPHB2     | 13      | 0,82      | 1,12                  | 0,97                  | 1,54           | 0,58                       | 2,62                       |
| F3        | 13      | 1,00      | 0,65                  | 0,24                  | 0,64           | 0,19                       | 1,40                       |
| FGFR1     | 13      | 1,00      | 1,05                  | 1,04                  | 0,85           | 0,83                       | 1,84                       |
| HGF       | 13      | 1,00      | 1,06                  | 0,96                  | 0,86           | 1,13                       | 2,51                       |
| IL2       | 13      | 1,00      | 1,22                  | 0,60                  | 0,51           | 1,14                       | 6,29                       |
| IRAK4     | 13      | 1,00      | 0,90                  | 0,82                  | 0,46           | 0,60                       | 1,30                       |
| LEPR      | 13      | 1,00      | 1,34                  | 1,29                  | 0,40           | 0,52                       | 10,77                      |
| LRP5      | 13      | 1,00      | 1,62                  | 1,07                  | 1,90           | 1,25                       | 25,65                      |
| SPP1      | 13      | 1,00      | 1,17                  | 2,54                  | 0,87           | 1,40                       | 78,24                      |
| PDCD1     | 13      | 1,00      | 0,53                  | 0,36                  | 0,07           | 0,44                       | 6,13                       |
| PDGFA     | 13      | 1,01      | 0,89                  | 0,88                  | 1,13           | 0,75                       | 2,20                       |
| PDGFRA    | 13      | 1,00      | 0,97                  | 0,88                  | 0,66           | 0,62                       | 2,62                       |
| PECAM1    | 13      | 1,00      | 0,97                  | 0,80                  | 0,65           | 0,68                       | 1,56                       |
| RORA      | 13      | 1,00      | 1,35                  | 1,36                  | 1,11           | 0,78                       | 2,23                       |
| RUNX2     | 13      | 1,01      | 0,80                  | 0,72                  | 0,42           | 0,42                       | 1,26                       |
| SMAD3     | 13      | 1,00      | 1,15                  | 1,11                  | 0,91           | 0,86                       | 2,79                       |
| SMAD4     | 13      | 1,00      | 0,99                  | 1,01                  | 0,91           | 0,60                       | 1,60                       |
| SOCS6     | 13      | 1,00      | 1,47                  | 1,26                  | 0,90           | 0,74                       | 2,18                       |
| TGFB2     | 13      | 1,01      | 0,40                  | 1,27                  | 0,63           | 0,33                       | 44,33                      |
| TGFBR1    | 13      | 1,00      | 0,48                  | 0,76                  | 0,39           | 0,53                       | 1,59                       |
| CDH5      | 13      | 1,00      | 1,27                  | 0,91                  | 0,78           | 0,80                       | 1,96                       |
| WNT5A     | 13      | 1,00      | 0,89                  | 1,45                  | 0,60           | 0,58                       | 3,00                       |

Supplemental table 3: Highlight on differential expression profiles of neutrophil-related genes quantified in the six different conditions (WT PBS vs WT L2-MHV3 48h PI vs WT L2-MHV3 72hPI vs IL-33 KO PBS vs IL-33 KO L2-MHV3 48h PI vs IL-33 KO L2-MHV3 72h PI).

| Gene name | PATTERN | WT PBS | WT L2-MHV3-48h | WT L2-MHV3-72h | IL-33KO PBS | IL-33KO L2-MHV3-48h | IL-33KO L2-MHV3-72h |
|-----------|---------|--------|----------------|----------------|-------------|---------------------|---------------------|
| CXCR1     | 4       | 1,00   | 3,24           | 3,00           | 0,22        | 2,07                | 2,04                |
| CXCR2     | 6       | 1,02   | 4,65           | 2,32           | 2,05        | 2,06                | 0,15                |
| CCL2      | 11      | 1,00   | 18,90          | 50,63          | 0,28        | 14,15               | 207,67              |
| CXCL1     | 11      | 1,00   | 13,46          | 18,30          | 0,19        | 13,47               | 72,81               |
| CXCL2     | 11      | 1,00   | 37,29          | 88,33          | 0,36        | 23,59               | 593,79              |
| CCL6      | 12      | 1,00   | 2,23           | 3,06           | 0,46        | 1,62                | 7,55                |
| CXCL5     | 12      | 1,01   | 3,25           | 3,19           | 0,13        | 1,88                | 25,92               |
